# Supplementary material for: Effect of Stenting Strategy on the Outcome in Patients with Non-Left Main Bifurcation Lesions
Source: MDPI journal article supplement (doi:10.3390/jcm11195658), 2022-09-26
Supplement: s1 [file s1]

# ***Supplementary Material***

## **APPENDIX**

### **CONTENTS**

#### **Supplementary Methods**

#### **Supplementary Tables**

#### **Supplementary Figures and Figure Legends**

#### **Supplementary Methods**

##### **Percutaneous coronary intervention**

Patients who had percutaneous coronary intervention (PCI) were pre-treated with loading doses of aspirin (300 mg) and clopidogrel (300-600 mg) unless these antiplatelet medications had previously been administered. Low molecular weight heparin or unfractionated heparin was used during PCI to achieve an activated clotting time of 250–300 seconds. Access, type of drug-eluting stents, use of intravascular ultrasound or glycoprotein IIb/IIIa receptor inhibitors, stenting techniques for bifurcation lesions were at the operator's discretion. The duration of the dual antiplatelet medications were at least six months, and aspirin was prescribed indefinitely.

## Supplementary Figures and Figure Legends

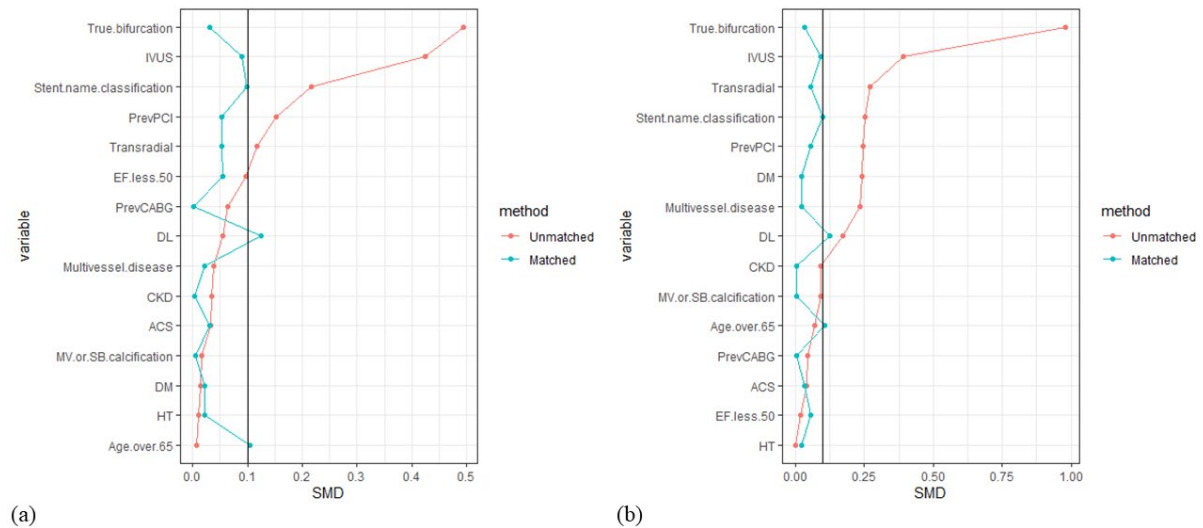

**Figure S1**, Standardized mean difference before and after matching was shown for a) LAD bifurcation lesion group, b) non-LAD bifurcation lesion group. Most variables are matched with SMD lower than 0.1.

LAD= left anterior descending; IVUS= intravascular ultrasound; PCI= percutaneous coronary intervention; EF= ejection fraction; PrevCABG= previous coronary artery bypass graft surgery; DL= dyslipidemia; CKD= chronic kidney disease; ACS= acute coronary syndrome; DM= diabetes mellitus; HT= hypertension

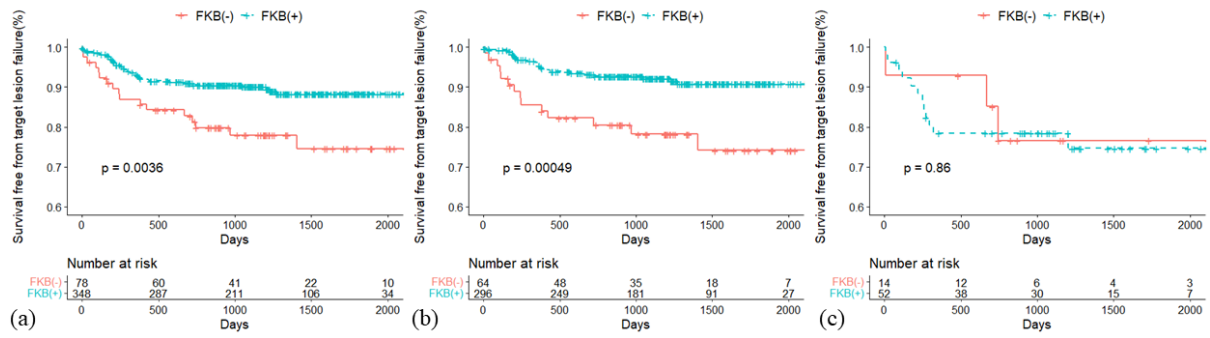

**Figure S2**, Kaplan-Meier curves for TLF according to final kissing balloon with elective two-stent strategy in a) LAD and non-LAD bifurcation lesions, b) LAD bifurcation and c) non-LAD bifurcation lesions

LAD= left anterior descending; FKB= final kissing balloon; TLF= target lesion failure

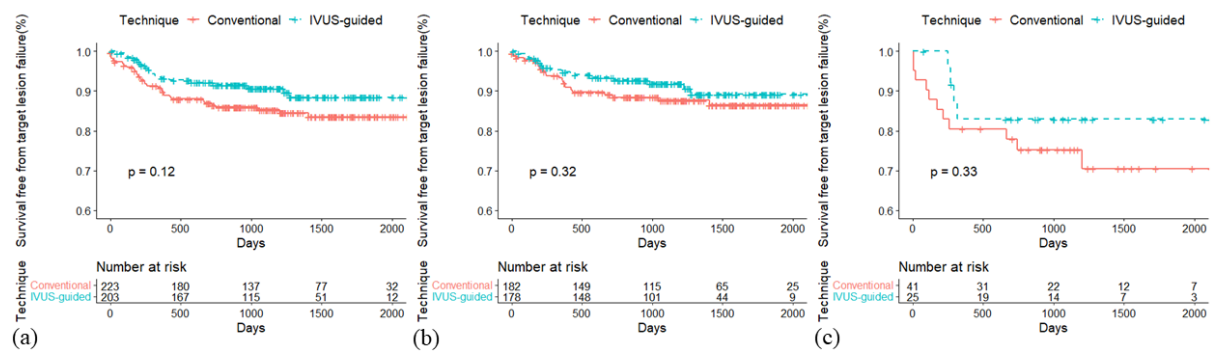

**Figure S3**, Kaplan-Meier curves for TLF according to IVUS guidance with elective two-stent strategy in a) LAD and non-LAD bifurcation lesions, b) LAD bifurcation and c) non-LAD bifurcation lesions

IVUS= intravascular ultrasound; LAD= left anterior descending; TLF= target lesion failure

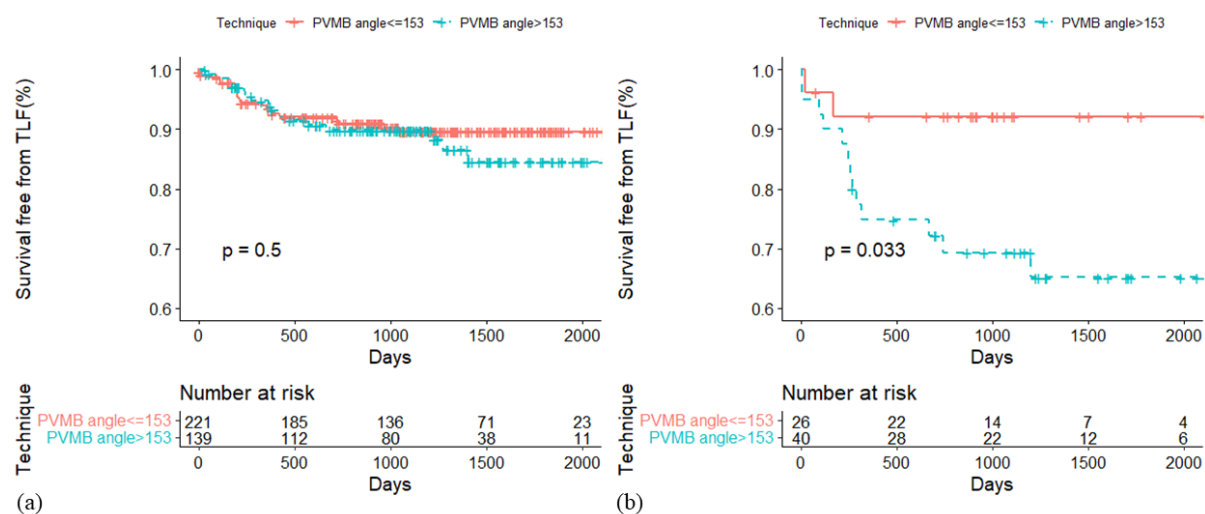

**Figure S4**, Kaplan-Meier curves for TLF according to PV-MB angle in bifurcation lesions treated with elective two-stent strategy in a) LAD bifurcation lesions and b) non-LAD bifurcation lesions

LAD= left anterior descending; MB= main branch; PV= parent vessel; TLF= target lesion failure

## Supplementary Tables

| Table S1. Mean difference, standard deviation and SMD after propensity score matching |                             |             |       |                               |             |       |
|---------------------------------------------------------------------------------------|-----------------------------|-------------|-------|-------------------------------|-------------|-------|
|                                                                                       | LAD Bifurcation (n = 1,551) |             |       | Non-LAD Bifurcation (n = 493) |             |       |
|                                                                                       | Planned 1                   | Elective 2  | SMD   | Planned 1                     | Elective 2  | SMD   |
|                                                                                       | (n=613)                     | (n=340)     |       | (n=112)                       | (n=57)      |       |
| Age>65 (mean (SD))                                                                    | 0.41 (0.49)                 | 0.41 (0.49) | 0.005 | 0.46 (0.50)                   | 0.40 (0.49) | 0.104 |
| Acute coronary syndrome (mean (SD))                                                   | 0.64 (0.48)                 | 0.63 (0.48) | 0.028 | 0.63 (0.48)                   | 0.65 (0.48) | 0.031 |
| Diabetes mellitus (mean (SD))                                                         | 0.26 (0.44)                 | 0.27 (0.44) | 0.022 | 0.38 (0.49)                   | 0.39 (0.49) | 0.022 |
| Hypertension (mean (SD))                                                              | 0.56 (0.50)                 | 0.56 (0.50) | 0.011 | 0.61 (0.49)                   | 0.60 (0.49) | 0.022 |
| Dyslipidemia (mean (SD))                                                              | 0.31 (0.46)                 | 0.30 (0.46) | 0.029 | 0.26 (0.44)                   | 0.32 (0.47) | 0.125 |
| Chronic kidney disease (mean (SD))                                                    | 0.02 (0.15)                 | 0.02 (0.15) | 0.006 | 0.04 (0.19)                   | 0.04 (0.19) | 0.003 |

|                                                            |             |             |       |             |             |       |
|------------------------------------------------------------|-------------|-------------|-------|-------------|-------------|-------|
| Previous CABG<br>(mean (SD))                               | 0.00 (0.06) | 0.00 (0.05) | 0.006 | 0.02 (0.13) | 0.02 (0.13) | 0.002 |
| Previous PCI<br>(mean (SD))                                | 0.13 (0.34) | 0.13 (0.34) | 0.008 | 0.20 (0.40) | 0.18 (0.38) | 0.054 |
| LVEF<50%<br>(mean (SD))                                    | 0.16 (0.36) | 0.16 (0.37) | 0.022 | 0.18 (0.38) | 0.16 (0.37) | 0.055 |
| Stent type (%)                                             |             |             | 0.051 |             |             | 0.099 |
| EES                                                        | 44(7.2)     | 27 (7.9)    |       | 14 (12.5)   | 8 (14.0)    |       |
| PES                                                        | 157 (25.6)  | 90 (26.5)   |       | 38 (33.9)   | 19 (33.3)   |       |
| SES                                                        | 343 (56.0)  | 189 (55.6)  |       | 52 (46.4)   | 25 (43.9)   |       |
| ZES                                                        | 55 (9.0)    | 27 (7.9)    |       | 7 (6.2)     | 4 (7.0)     |       |
| Others                                                     | 14 (2.3)    | 7 (2.1)     |       | 1 (0.9)     | 1 (1.8)     |       |
| Multivessel disease<br>(mean (SD))                         | 0.42 (0.49) | 0.42 (0.49) | 0.006 | 0.62 (0.49) | 0.61 (0.49) | 0.022 |
| Main branch or side<br>branch calcification<br>(mean (SD)) | 0.22 (0.41) | 0.20 (0.40) | 0.038 | 0.07 (0.26) | 0.07 (0.26) | 0.005 |

|                                                     |             |             |       |             |             |       |
|-----------------------------------------------------|-------------|-------------|-------|-------------|-------------|-------|
| True bifurcation<br>(mean (SD))                     | 0.71 (0.45) | 0.75 (0.44) | 0.073 | 0.81 (0.39) | 0.82 (0.38) | 0.031 |
| Guidance of intravascular<br>ultrasound (mean (SD)) | 0.39 (0.49) | 0.46 (0.50) | 0.152 | 0.24 (0.43) | 0.28 (0.45) | 0.09  |
| Transradial (mean (SD))                             | 0.16 (0.37) | 0.20 (0.40) | 0.084 | 0.20 (0.40) | 0.18 (0.38) | 0.054 |

Values were expressed as the mean difference (SD)

CAD= coronary artery disease; EES= everolimus-eluting stent(s); LAD = left anterior descending artery; LVEF= left ventricle ejection fraction; MI= myocardial infarction; PCI= percutaneous coronary intervention; PES = paclitaxel-eluting stent(s); SB= side branch; SD= standard deviation; SES = sirolimus-eluting stent(s); ZES = zotarolimus-eluting stent(s)



**Table S2.** QCA according to treatment strategies and IVUS usage

|                      | Planned 1    |             |       | Elective 2   |             |       |
|----------------------|--------------|-------------|-------|--------------|-------------|-------|
|                      | Conventional | IVUS-guided | p     | Conventional | IVUS-guided | p     |
|                      | (n=1184)     | (n=434)     |       | (n=223)      | (n=203)     |       |
| Pre-intervention     |              |             |       |              |             |       |
| PV-MB angle          | 148.2± 17.5  | 149.4±15.7  | 0.19  | 149.4± 17.4  | 146.5±17.9  | 0.09  |
| PV-SB angle          | 149.4± 19.5  | 149.5±21.2  | 0.92  | 154.0± 18.2  | 153.4±16.7  | 0.72  |
| PV RD, mm            | 57.3 ± 19.3  | 57.6 ± 19.7 | 0.77  | 50.7 ± 16.2  | 55.1 ± 18.1 | <0.01 |
| MB RD, mm            | 3.3 ± 0.5    | 3.2 ± 0.5   | 0.41  | 3.3 ± 0.5    | 3.2 ± 0.5   | 0.12  |
| SB RD, mm            | 2.7 ± 0.4    | 2.7 ± 0.5   | 0.53  | 2.6 ± 0.5    | 2.6 ± 0.4   | 0.80  |
| PV MLD, mm           | 2.4 ± 0.3    | 2.4 ± 0.3   | 0.63  | 2.4 ± 0.3    | 2.4 ± 0.3   | 0.76  |
| MB Ostium MLD, mm    | 1.5 ± 0.9    | 1.6 ± 0.8   | 0.015 | 1.8 ± 0.8    | 1.7 ± 0.8   | 0.21  |
| MB Ostium Diameter   | 1.3 ± 0.7    | 1.3 ± 0.6   | 0.29  | 1.2 ± 0.7    | 1.3 ± 0.7   | 0.57  |
| Stenosis (%)         |              |             |       |              |             |       |
| SB Ostium MLD, mm    | 51.4 ± 24.2  | 50.1 ± 23.2 | 0.32  | 51.9 ± 24.7  | 50.4 ± 25.1 | 0.54  |
| SB Ostium Diameter   | 1.4 ± 0.6    | 1.5 ± 0.6   | 0.015 | 1.0 ± 0.5    | 1.0 ± 0.5   | 0.57  |
| Stenosis (%)         |              |             |       |              |             |       |
| MB lesion length, mm | 43.0 ± 23.5  | 39.9 ± 21.4 | 0.012 | 59.3 ± 21.8  | 58.1 ± 20.1 | 0.56  |

|                                                                                                               |             |             |       |             |             |       |
|---------------------------------------------------------------------------------------------------------------|-------------|-------------|-------|-------------|-------------|-------|
| SB lesion length, mm                                                                                          | 18.6 ± 11.4 | 18.8 ± 11.0 | 0.78  | 21.2 ± 12.5 | 19.5 ± 13.6 | 0.17  |
| PV RD, mm                                                                                                     | 4.2 ± 6.0   | 3.6 ± 5.8   | 0.06  | 10.9 ± 8.8  | 11.3 ± 9.0  | 0.62  |
| Post-intervention                                                                                             |             |             |       |             |             |       |
| PV Residual Stenosis (%)                                                                                      | 11.3 ± 10.8 | 9.6 ± 9.5   | <0.01 | 8.3 ± 9.3   | 6.7 ± 9.0   | 0.094 |
| MB Ostium Residual Stenosis (%)                                                                               | 6.2 ± 10.1  | 4.4 ± 8.6   | <0.01 | 4.7 ± 7.7   | 3.1 ± 5.9   | 0.018 |
| MB Distal Residual Stenosis (%)                                                                               | 8.6 ± 18.5  | 7.2 ± 17.5  | 0.18  | 4.9 ± 11.2  | 5.1 ± 14.8  | 0.87  |
| SB Ostium Residual Stenosis (%)                                                                               | 42.1 ± 22.1 | 41.4 ± 21.4 | 0.55  | 10.2 ± 11.9 | 7.3 ± 12.5  | 0.015 |
| SB distal Residual Stenosis (%)                                                                               | 24.2 ± 19.8 | 23.8 ± 18.9 | 0.71  | 5.8 ± 7.7   | 4.6 ± 7.8   | 0.11  |
| Values were expressed as the mean ± SD.                                                                       |             |             |       |             |             |       |
| MB= main branch; MLD = minimal lumen diameter; PV= proximal vessel; RD = reference diameter; SB = side branch |             |             |       |             |             |       |

**Table S3.** QCA according to lesion location

|                      | <b>LAD Bifurcation</b> | <b>Non-LAD Bifurcation</b> | <b>P value</b> |
|----------------------|------------------------|----------------------------|----------------|
|                      | <b>(n = 1,551)</b>     | <b>(n = 493)</b>           |                |
| Pre-intervention     |                        |                            |                |
| PV-MB angle          | 147.4 ± 17.0           | 151.8 ± 17.3               | <0.01          |
| PV-SB angle          | 152.8 ± 18.4           | 142.6 ± 21.0               | <0.01          |
| MB-SB angle          | 55.0 ± 18.2            | 60.9 ± 21.0                | <0.01          |
| PV RD, mm            | 3.3 ± 0.5              | 3.2 ± 0.5                  | 0.673          |
| MB RD, mm            | 2.7 ± 0.4              | 2.6 ± 0.4                  | 0.379          |
| SB RD, mm            | 2.4 ± 0.3              | 2.5 ± 0.3                  | <0.01          |
| PV MLD, mm           | 1.6 ± 0.8              | 1.4 ± 0.9                  | <0.01          |
| MB Ostium MLD, mm    | 1.3 ± 0.7              | 1.4 ± 0.7                  | 0.057          |
| MB Ostium Diameter   | 51.8 ± 23.9            | 48.8 ± 24.7                | 0.018          |
| Stenosis (%)         |                        |                            |                |
| SB Ostium MLD, mm    | 1.3 ± 0.6              | 1.5 ± 0.7                  | <0.01          |
| SB Ostium Diameter   | 47.1 ± 22.9            | 40.9 ± 25.1                | <0.01          |
| Stenosis (%)         |                        |                            |                |
| MB lesion length, mm | 19.3 ± 11.9            | 18.0 ± 10.8                | 0.016          |

|                                                                                              |             |             |       |
|----------------------------------------------------------------------------------------------|-------------|-------------|-------|
| SB lesion length, mm                                                                         | 5.9 ± 7.3   | 4.2 ± 6.9   | 0     |
| Post-intervention                                                                            |             |             |       |
| PV Residual Stenosis (%)                                                                     | 9.5 ± 9.7   | 12.2 ± 11.6 | <0.01 |
| MB Ostium Residual Stenosis (%)                                                              | 4.5 ± 7.5   | 8.0 ± 13.0  | <0.01 |
| MB Distal Residual Stenosis (%)                                                              | 6.9 ± 16.6  | 9.4 ± 19.2  | 0.011 |
| SB Ostium Residual Stenosis (%)                                                              | 35.5 ± 24.7 | 33.1 ± 23.2 | 0.056 |
| SB distal Residual Stenosis (%)                                                              | 20.8 ± 19.4 | 18.2 ± 19.0 | 0.012 |
| Values were expressed as the mean ± SD.                                                      |             |             |       |
| MB= main branch; MLD = minimal lumen diameter; PV= proximal vessel; RD = reference diameter; |             |             |       |
| SB = side branch                                                                             |             |             |       |
